# Supplementary material for: A locus on barley chromosome 5H affects adult plant resistance to powdery mildew
Source: PubMed Central journal article supplement (PMC6096521; doi:10.1007/s11032-018-0858-2), 2018-07-28
Supplement: 11032_2018_858_MOESM3_ESM.pdf [file 11032_2018_858_MOESM3_ESM.pdf]

**Article:** A locus on barley chromosome 5H affects adult plant resistance to powdery mildew

**Journal:** Molecular Breeding

**Authors:** Sanjiv Gupta, Elysia Vassos, Beata Sznajder, Rebecca Fox, Kelvin H. P. Khoo, Robert Loughman, Kenneth J. Chalmers and Diane E. Mather

**Corresponding author:** Diane E. Mather, The University of Adelaide, [diane.mather@adelaide.edu.au](mailto:diane.mather@adelaide.edu.au)

### Online Resource 3

Features of curated linkage maps constructed for CLE210/Baudin and Denar/Baudin. The whole-genome maps and the GBS maps of chromosome 5H were derived from genotyping-by-sequencing data. The KASP maps were derived from KASP marker assay data for SNPs on chromosome 5H

|                                                  | Whole genome  |              | Chromosome 5H |          |              |          |
|--------------------------------------------------|---------------|--------------|---------------|----------|--------------|----------|
|                                                  | CLE210/Baudin | Denar/Baudin | CLE210/Baudin |          | Denar/Baudin |          |
|                                                  |               |              | GBS map       | KASP map | GBS map      | KASP map |
| Number of doubled haploid lines                  | 200           | 235          | 200           | 209      | 235          | 236      |
| Number of SNP markers                            | 579           | 869          | 117           | 88       | 172          | 71       |
| Number of silicoDArT markers                     | 135           | 113          | 18            | 11       | 17           | 4        |
| Number of positions at which markers were mapped | 561           | 499          | 107           | 53       | 87           | 45       |
| Total map length (cM)                            | 1857          | 1372         | 327           | 168      | 214          | 183      |
| Maximum interval length (cM)                     | 22            | 32           | 20            | 19       | 29           | 27       |
